# Supplementary material for: 6′-O-Caffeoylarbutin from Quezui Tea: A Highly Effective and Safe Tyrosinase Inhibitor
Source: MDPI journal article supplement (doi:10.3390/ijms25020972), 2024-01-12
Supplement: s1 [file s1]

# 6'-O-Caffeoylarbutin from Quezui Tea: A Highly Effective and Safe Tyrosinase Inhibitor

## Supplementary Materials

Dong Xie <sup>1,†</sup>, Wengan Fu <sup>1,†</sup>, Tiantian Yuan <sup>1</sup>, Kangjia Han <sup>1</sup>, Yuxiu Lv <sup>1</sup>, Qi Wang <sup>1</sup>, Qian Jiang <sup>1</sup>, Yingjun Zhang <sup>2</sup>, Guolei Zhu <sup>1</sup>, Junming Xu <sup>3</sup>, Ping Zhao <sup>1,\*</sup> and Xiaoqin Yang <sup>1,\*</sup>

- <sup>1</sup> Laboratory of National Forestry and Grassland Administration on Highly-Efficient Utilization of Forestry Biomass Resources in Southwest China, Southwest Forestry University, Kunming 650224, China; dong-xie@outlook.com (D.X.); 18751856651@163.com (W.F.); 19387322404@163.com (T.Y.); xqyhankangjia6174@163.com (K.H.); lvyuxiu0130@outlook.com (Y.L.); qiwang202312@163.com (Q.W.); m17368708632@163.com (Q.J.); guoleizhu@163.com (G.Z.)
- <sup>2</sup> Laboratory of Phytochemistry and Plant Resources in West China, Kunming Institute of Botany, Chinese Academy of Sciences, Kunming 650204, China; zhangyj@mail.kib.ac.cn
- <sup>3</sup> Institute of Chemical Industry of Forest Products, Chinese Academy of Forestry, Nanjing 210042, China; xujunming@icifp.cn
- \* Correspondence: hypzhao2022@163.com (P.Z.); yangxiaoqin@swfu.edu.cn (X.Y.)
- † These authors contributed equally to this work.

Total 18 pages, 8 Figures and 3 Tables

Contents of the Figures and the Tables

**Figure S1.** Melanin biosynthesis process

**Figure S2.** Chemical structures of *beta*-arbutin (1) and 6'-*O*-caffeoylarbutin (2)

**Figure S3.** <sup>1</sup>H NMR (A) and <sup>13</sup>C NMR (B) spectra of *beta*-arbutin

**Figure S4.** <sup>1</sup>H NMR (A) and <sup>13</sup>C NMR (B) spectra of 6'-*O*-caffeoylarbutin

**Figure S5.** Fluorescence quenching effect of 6'-*O*-caffeoylarbutin on mTyr

**Figure S6.** The docking of kojic acid with amino acid residue of pocket of mTyr.

**Figure S7.** Molecular dynamics (MD) simulation of 6'-*O*-caffeoylarbutin with mTyr

**Figure S8.** The browning inhibitory effect of 6'-*O*-caffeoylarbutin on apple juice

**Table S1.** mTyr inhibitory activities of 6'-*O*-caffeoylarbutin

**Table S2.** Observation of hydrogen bonds in the 6'-*O*-caffeoylarbutin-2Y9X protein complex obtained by molecular docking

**Table S3.** The results acute test of 6'-*O*-caffeoylarbutin in mice (n=20)

**Table S4.** Effect of 6'-*O*-caffeoylarbutin on body weight in mice

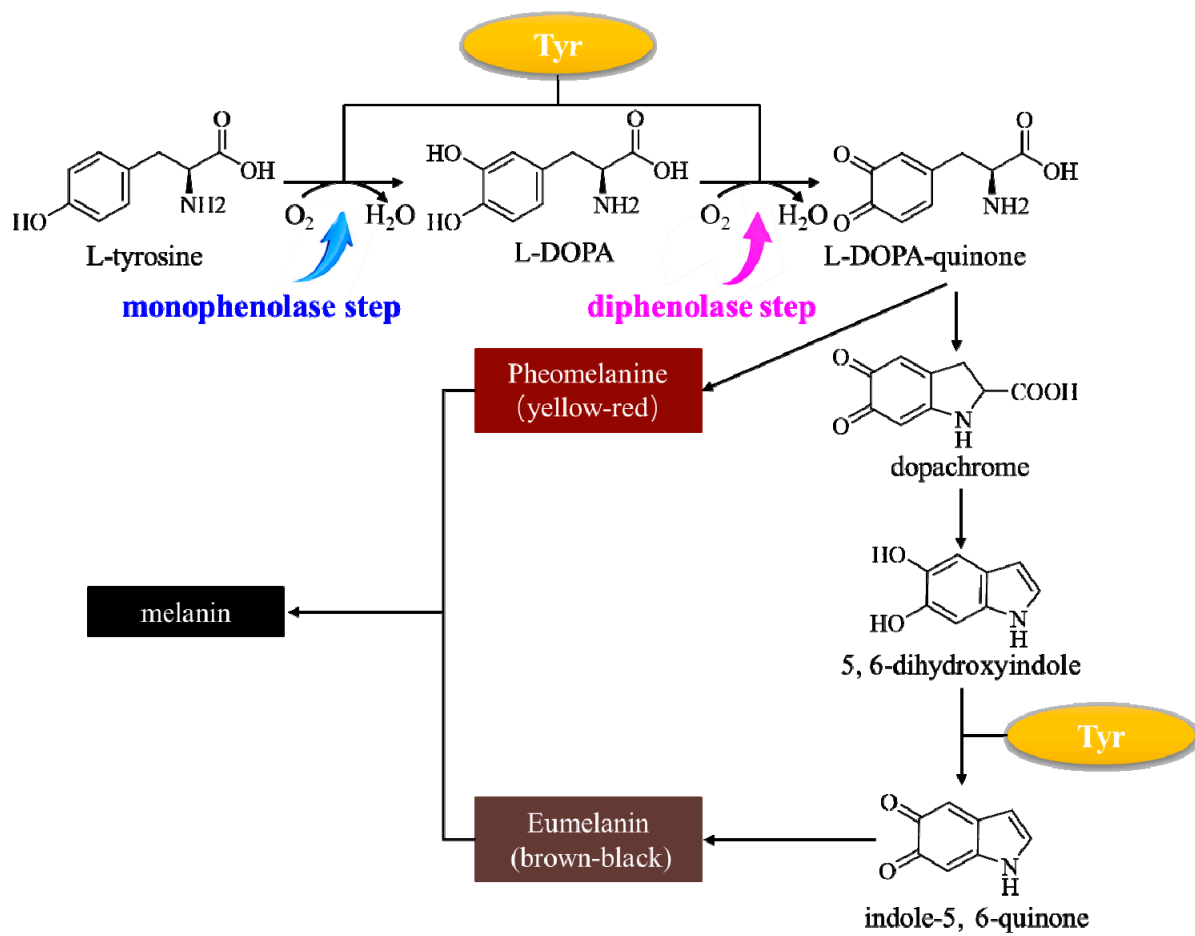

Figure S1. Melanin biosynthesis process

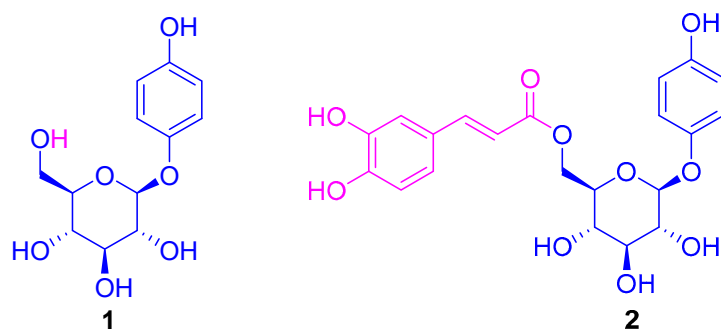

**Figure S2.** Chemical structures of *beta*-arbutin (1) and 6'-*O*-caffeoylarbutin (2)

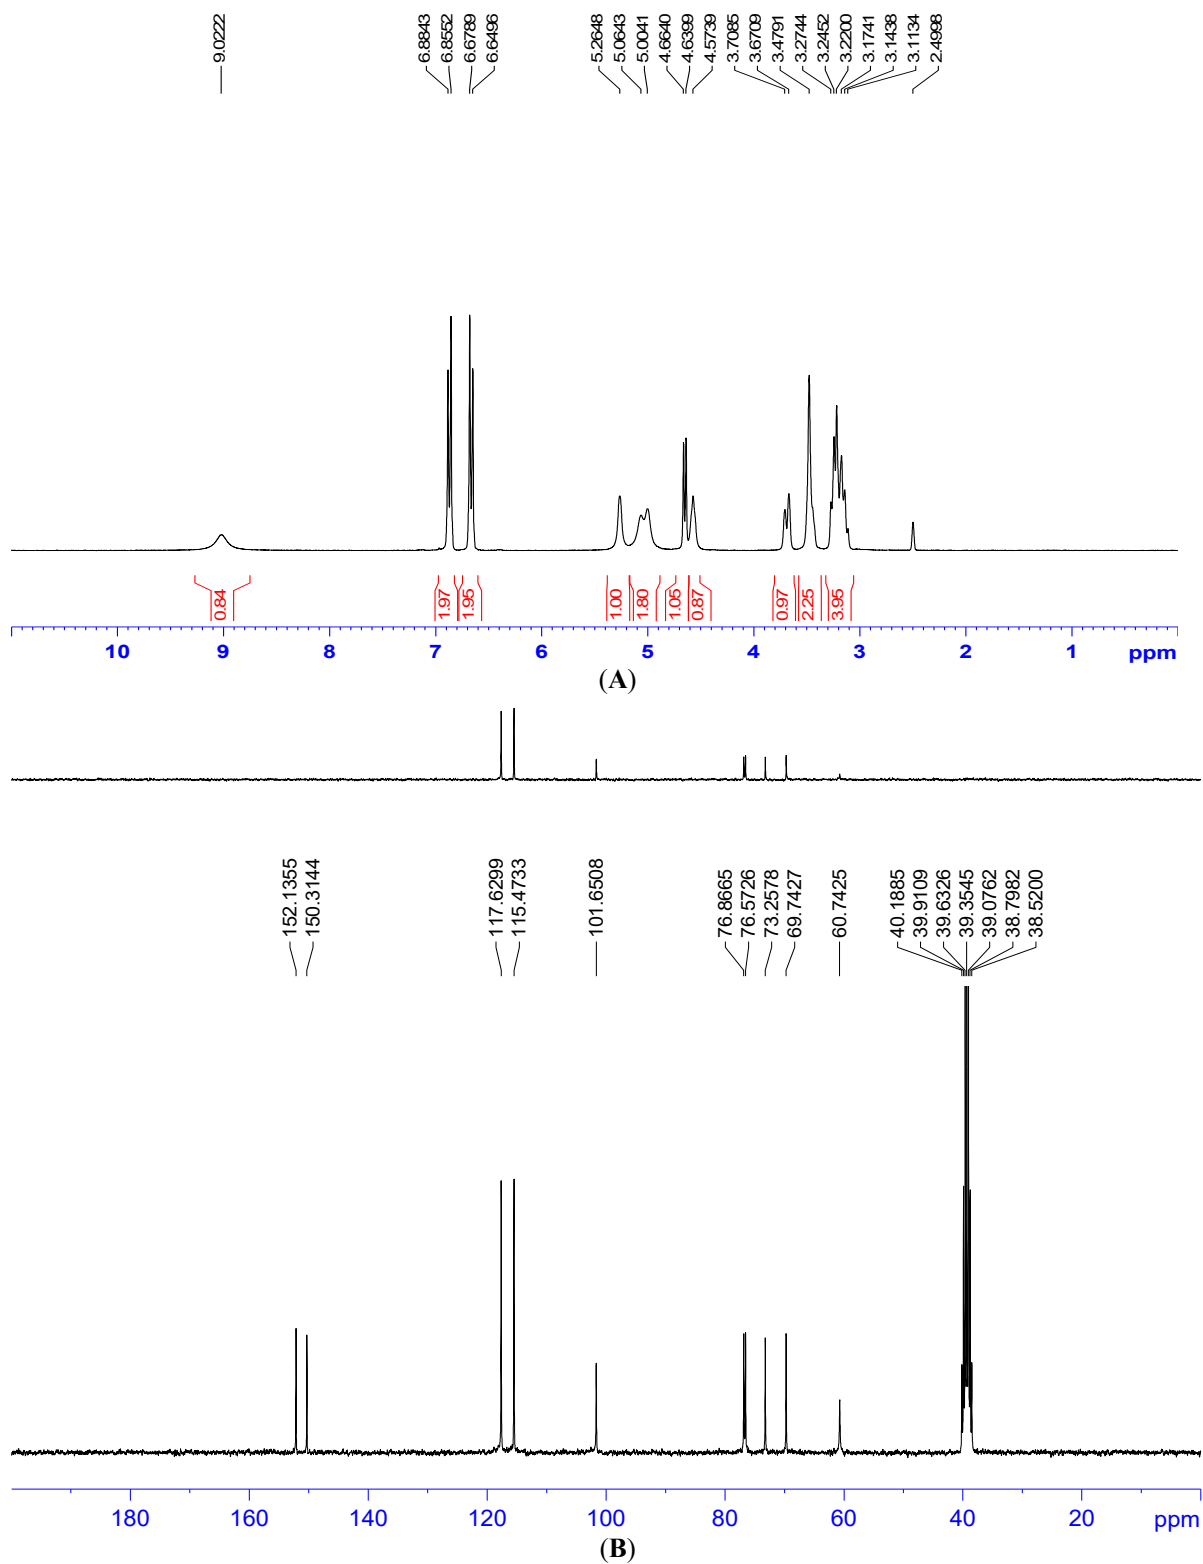

**Figure S3.**  $^1\text{H}$  NMR (A) and  $^{13}\text{C}$  NMR (B) spectra of *beta*-arbutin

$^1\text{H}$  NMR and  $^{13}\text{C}$  NMR assignments for *beta*-arbutin as follows:

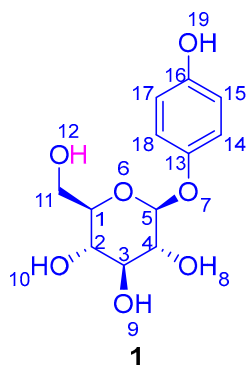

*beta*-arbutin (**1**), white solid,  $^1\text{H}$  NMR (300 MHz, DMSO)  $\delta_{\text{H}}$ : 9.02 (H, s, 19-H), 6.86 (2H, d,  $J = 8.6$  Hz, H-15, H-17), 6.66 (2H, d,  $J = 8.6$  Hz, H-14, H-18), 5.26 (1H, s, H-5), 5.03 (2H, d,  $J = 18.0$  Hz, H-8, H-10), 4.64 (1H, d,  $J = 7.2$  Hz, H-9), 4.57 (1H, s, H-12), 3.69 (1H, d,  $J = 11.7$  Hz, H-4), 3.48 (2H, s, H-2, H-3), 3.11-3.27 (3H, m, H-1, H-11);  $^{13}\text{C}$  NMR (75 MHz, DMSO),  $\delta_{\text{C}}$ : 152.1 (C-13), 150.3 (C-16), 117.6 (C-14, C-18), 115.5 (C-15, C-17), 101.7 (C-5), 76.9 (C-1), 76.6 (C-3), 73.3 (C-4), 69.7 (C-2), 60.7 (C-11).

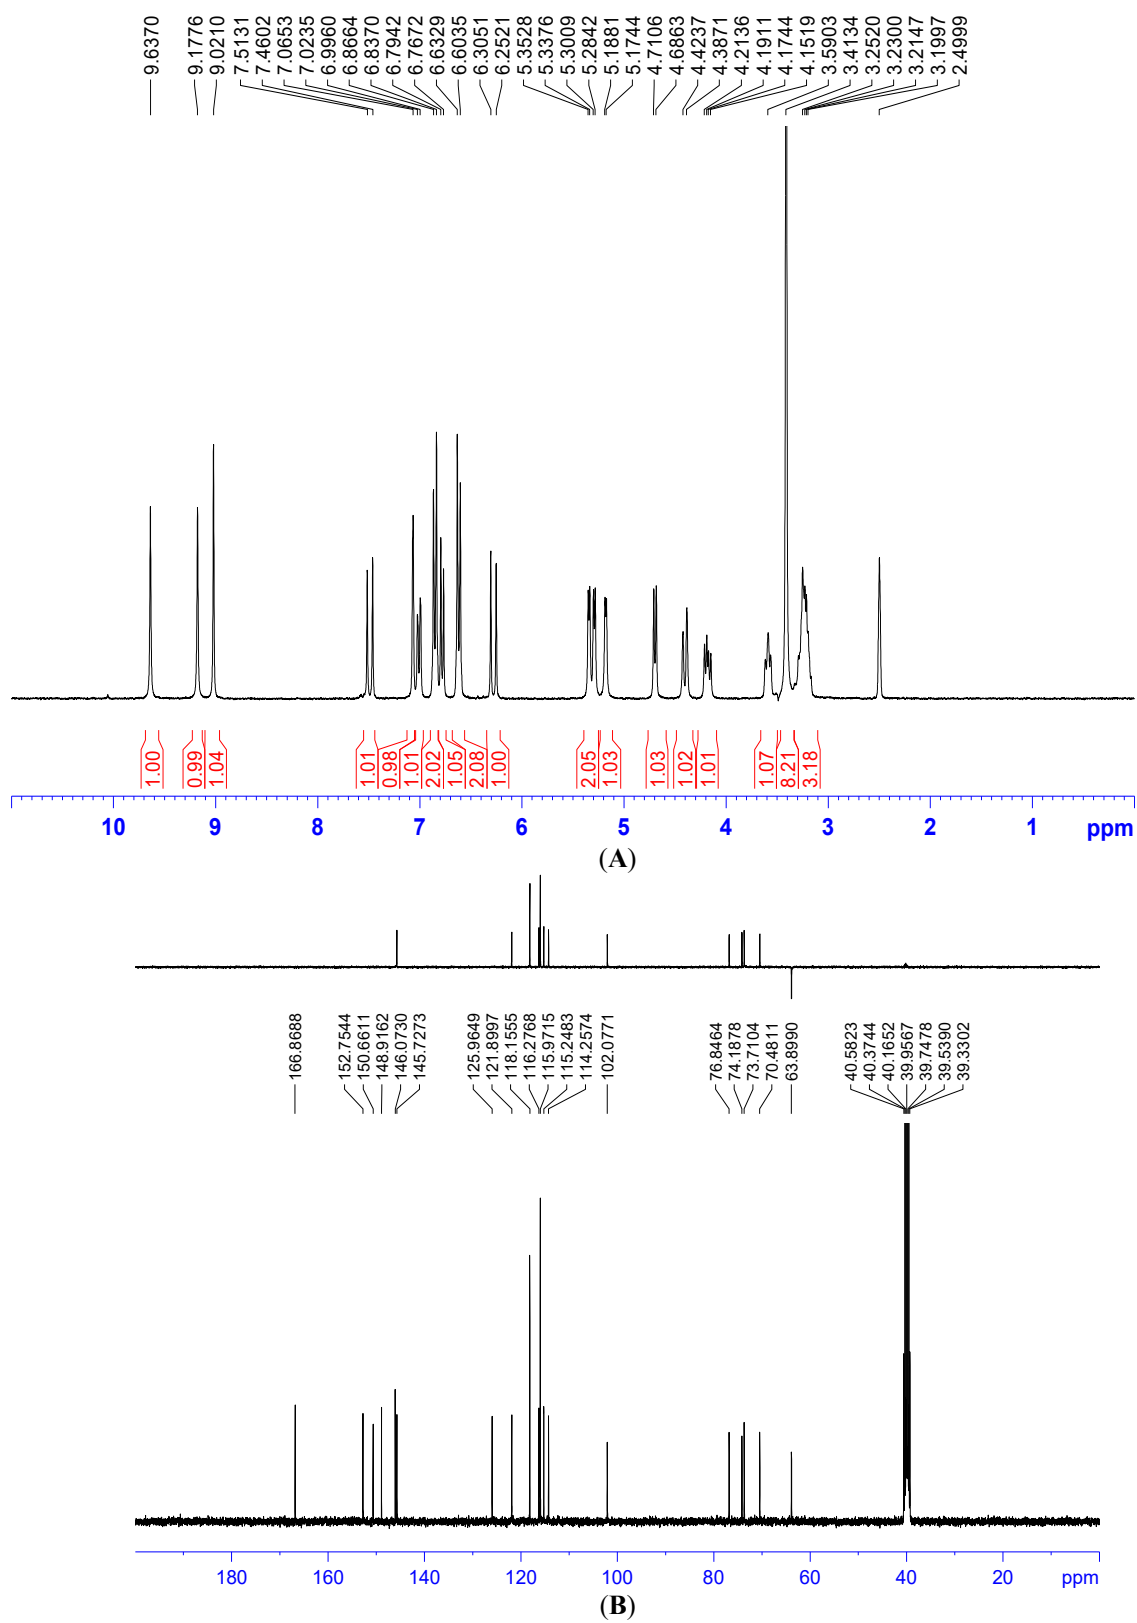

**Figure S4.**  $^1\text{H}$  NMR (A) and  $^{13}\text{C}$  NMR (B) for 6'-O-caffeoylarbutin

$^1\text{H}$  NMR and  $^{13}\text{C}$  NMR assignments for 6'-*O*-caffeoylarbutin as follows:

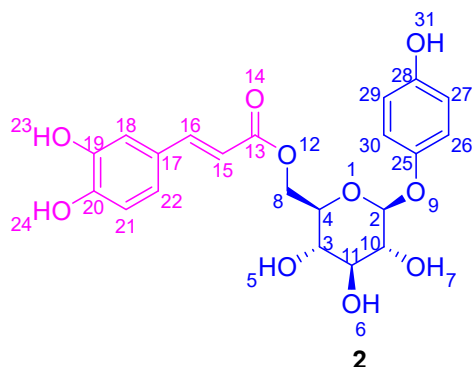

6'-*O*-caffeoylarbutin (**2**), colorless needles,  $^1\text{H}$  NMR (300 MHz, DMSO)  $\delta_{\text{H}}$ : 9.64 (1H, s, H-23), 9.18 (1H, s, H-24), 9.02 (1H, s, H-31), 7.48 (1H, d,  $J = 15.9$ , H-16), 7.05 (1H, s, H-18), 7.01 (1H, d,  $J = 1.8$  Hz, H-21), 6.84 (1H, d,  $J = 8.3$  Hz, H-22), 6.78 (2H, d,  $J = 8.1$  Hz, H-27/29), 6.62 (2H, d,  $J = 8.1$  Hz, H-26/30), 6.28 (1H, d,  $J = 15.9$  Hz, H-15), 5.34 (2H, m,  $J = 8.1$  Hz, H-8), 5.29 (1H, d,  $J = 4.2$  Hz, H-2), 4.70 (1H, d,  $J = 7.3$  Hz, H-10), 4.39 (1H, d,  $J = 11.1$  Hz, H-11), 4.20 (1H, m, H-3), 3.59 (1H, t, H-4);  $^{13}\text{C}$  NMR (75 MHz, DMSO),  $\delta_{\text{C}}$ : 166.9 (C-13), 152.8 (C-25), 150.7 (C-28), 148.9 (C-20), 146.1 (C-19), 145.7 (C-16), 126.0 (C-17), 121.9 (C-22), 118.2 (C-26/30), 116.3 (C-15), 116.0 (C-27/29), 115.2 (C-18), 114.3 (C-21), 102.1 (C-2), 76.8 (C-4), 74.2 (C-11), 73.7 (C-10), 70.5 (C-3), 63.9 (C-8).



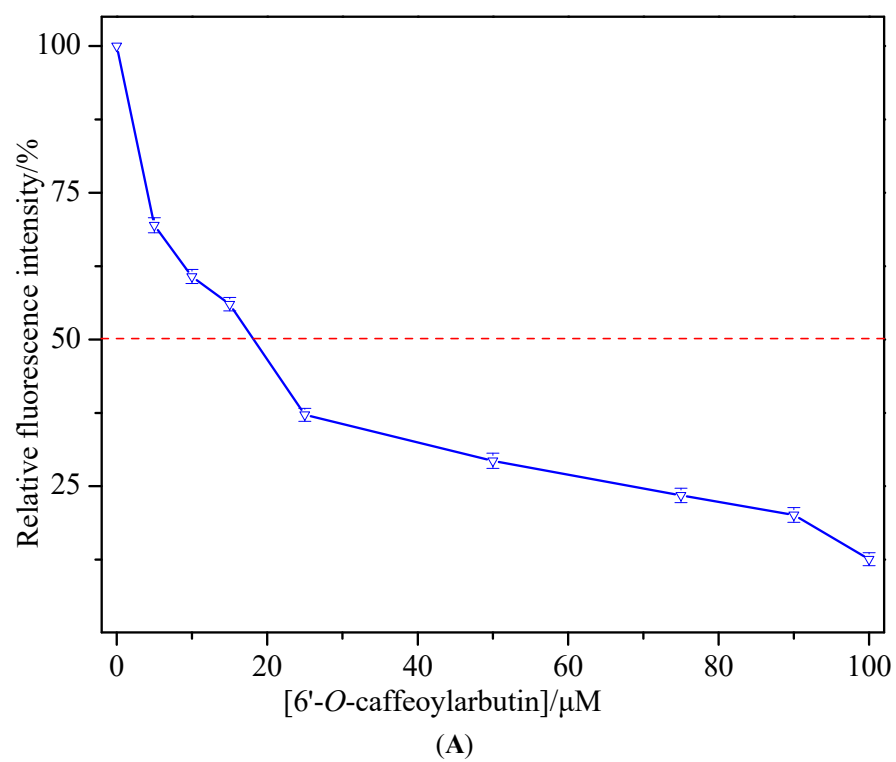

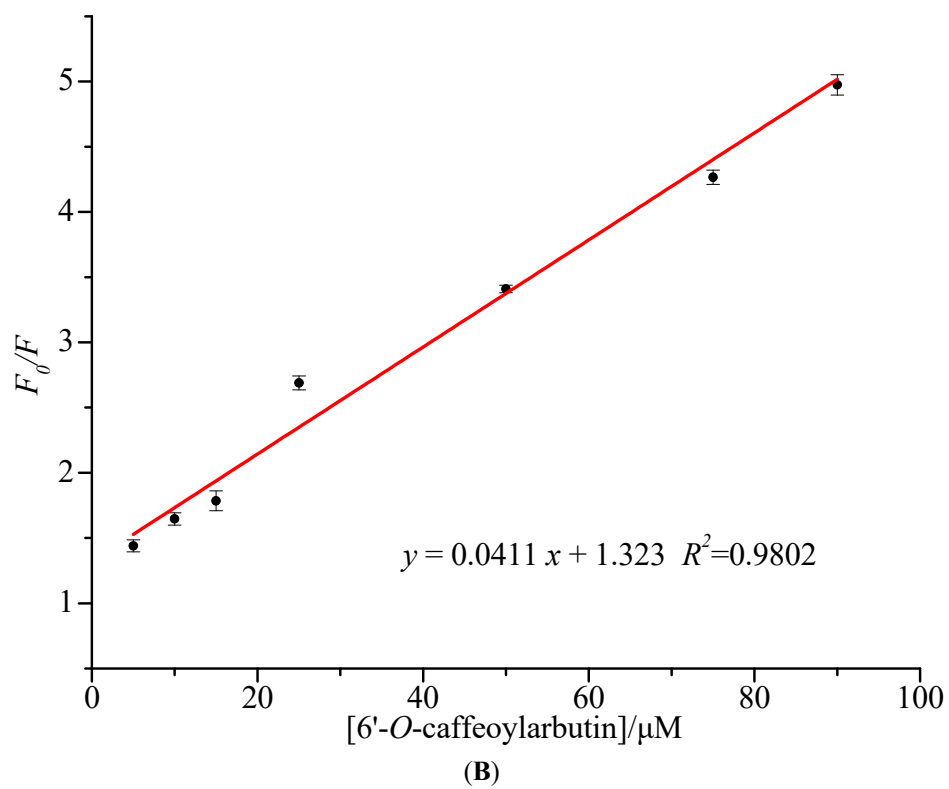

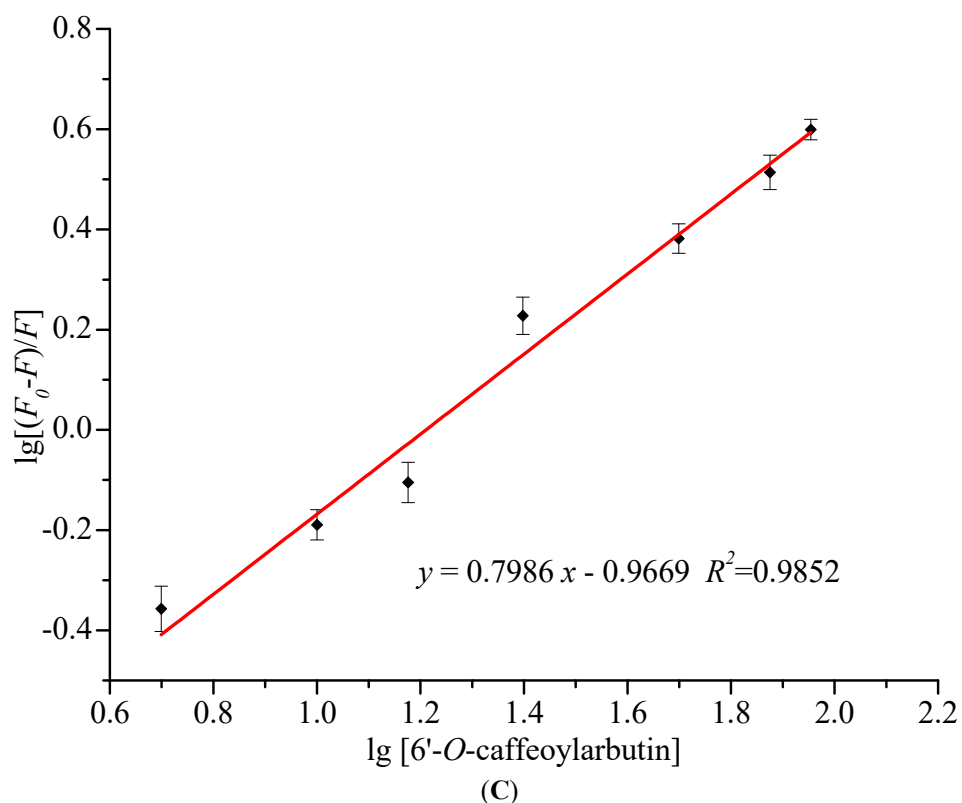

**Figure S5.** Fluorescence quenching effect of 6'-O-caffeoylarbutin on mTyr

(A). Relative fluorescence intensity of mTyr at different concentrations of 6'-O-caffeoylarbutin. (B). Stern-Volmer plot illustrating the fluorescence quenching of mTyr. C. Plot of  $\lg [(F_0-F)/F]$  against  $\lg [6'-O-caffeoylarbutin]$  for mTyr.

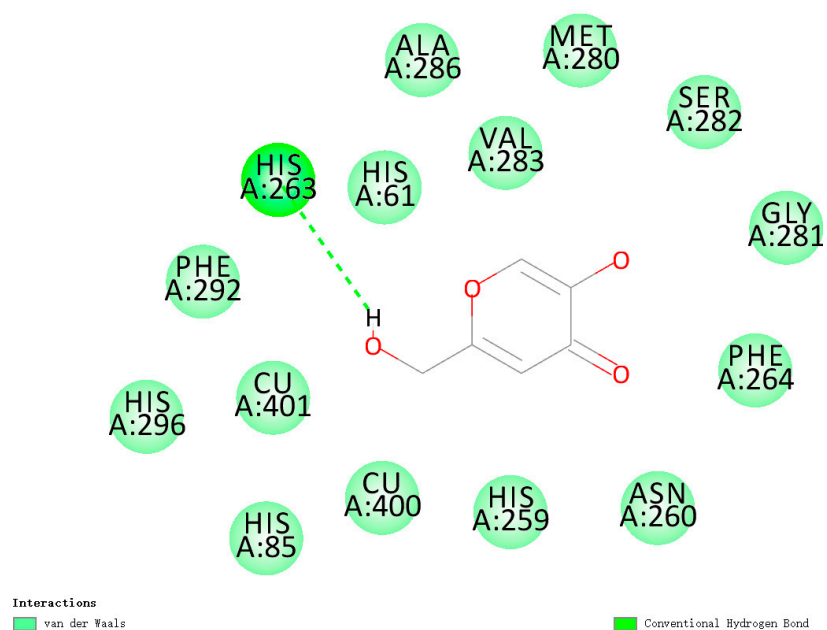

**Figure S6.** The docking of kojic acid with amino acid residue of pocket of mTyr.

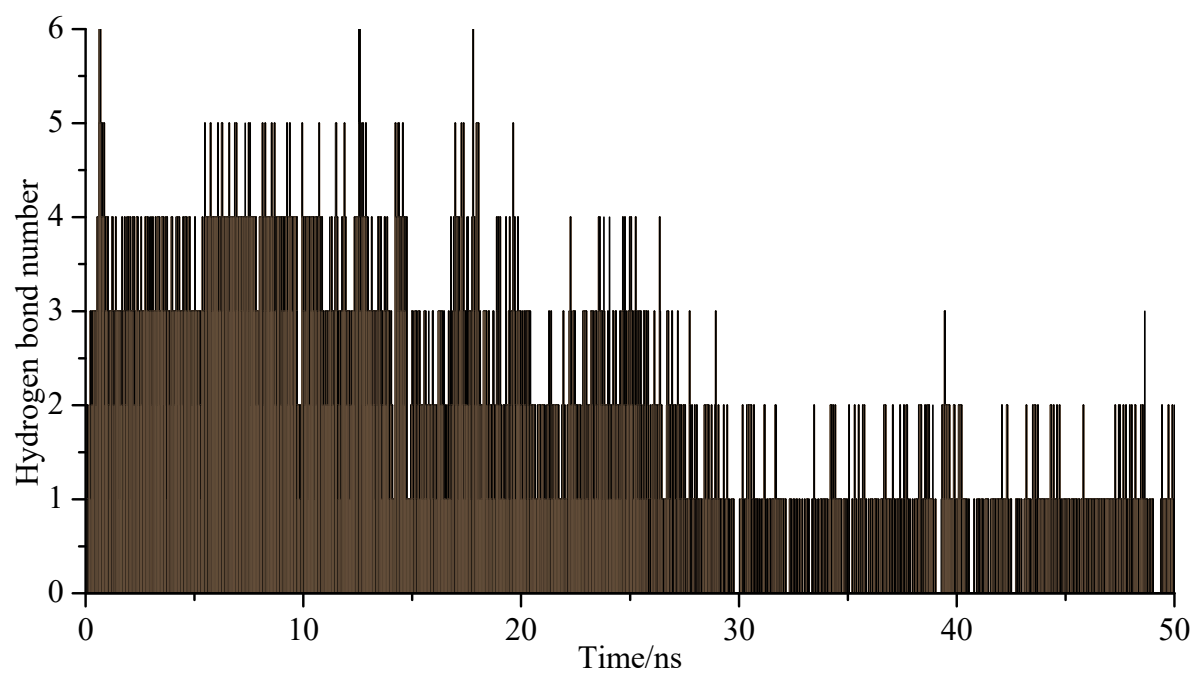

(A)

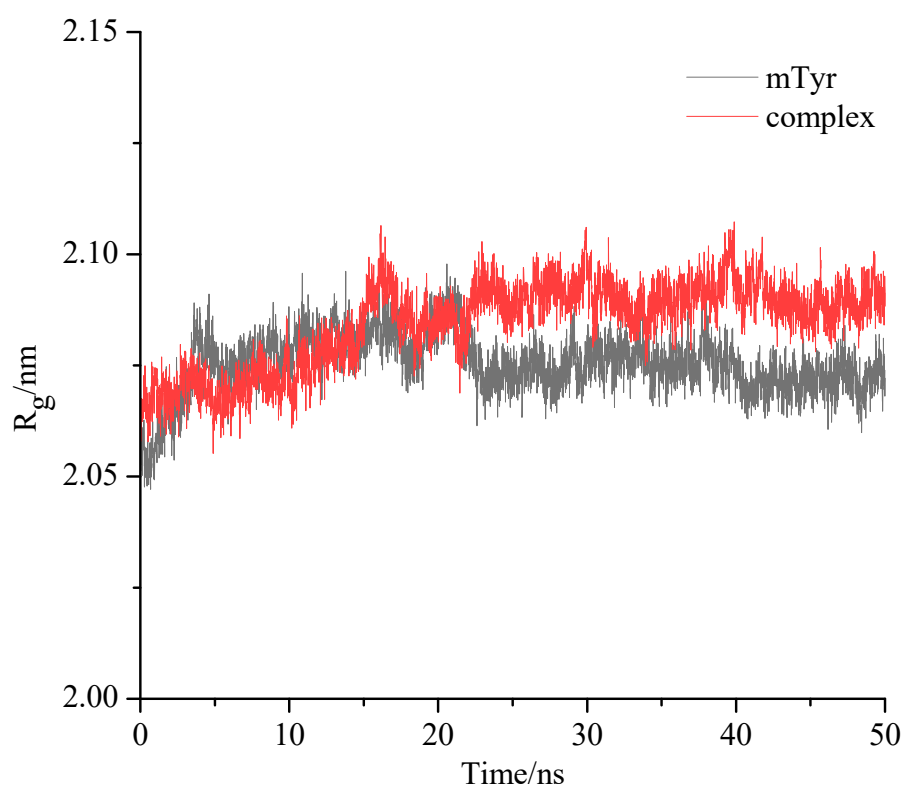

(B)

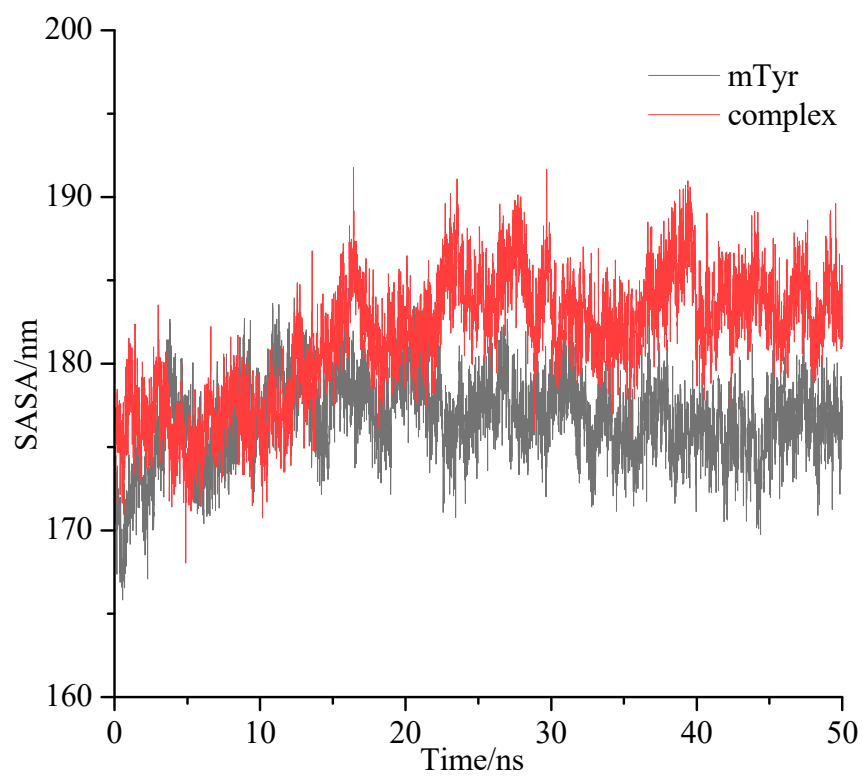

(C)

**Figure S7.** Molecular dynamics (MD) simulation of 6'-*O*-caffeoylarbutin with mTyr  
**(A).** The number of hydrogen bonds analysis. **(B).** Radius of gyration (Rg) change curve. **(C).** Solvent accessible surface area (SASA) change curve.

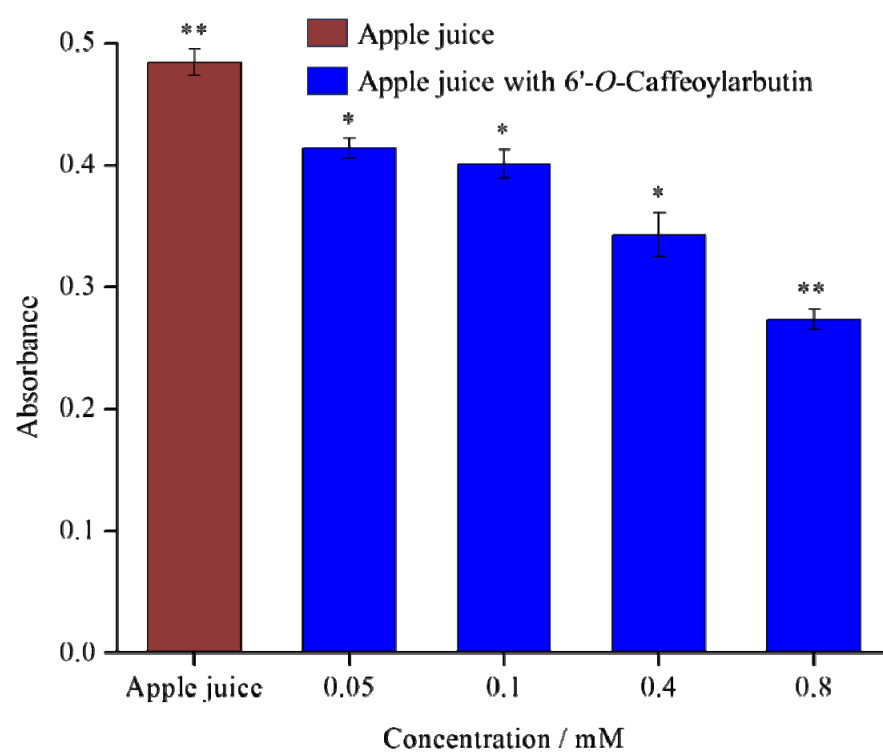

**Figure S8.** The browning inhibitory effect of 6'-O-caffeoylarbutin on apple juice



**Table S1.** mTyr inhibitory activities of 6'-*O*-caffeoylarbutin

| Compound                      | IC <sub>50</sub> <sup>a</sup> |                    |
|-------------------------------|-------------------------------|--------------------|
|                               | Substrate [L-Tyrosine]        | Substrate [L-DOPA] |
| 6'- <i>O</i> -Caffeoylarbutin | 1.1±0.1 µM                    | 95.2±1.1µM         |
| <i>beta</i> -Arbutin          | 8.4 mM                        | -                  |

<sup>a</sup>IC<sub>50</sub> values of all compounds are used as reference (Funayama et al., 1995 <https://doi.org/10.1271/bbb.59.143>; Liu et al., 2023 <https://doi.org/10.13386/j.issn1002-0306.2022070024>) and represent the concentration that caused 50% enzyme activity loss.

**Table S2.** Observation of hydrogen bonds in the 6'-*O*-caffeoylarbutin-2y9x protein complex obtained by molecular docking

| Amino acid species | 6'- <i>O</i> -caffeoylarbutin                                                     | Atoms forming hydrogen bonds |
|--------------------|-----------------------------------------------------------------------------------|------------------------------|
| Glu 322            | 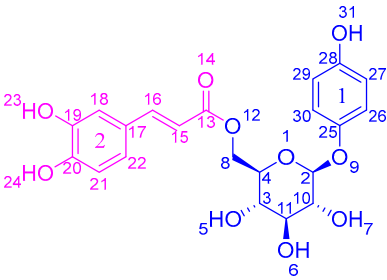 | hydrogen atom at position 23 |
| His 85             |                                                                                   | hydrogen atom at position 7  |
| Val 283            |                                                                                   | oxygen atom at position 7    |
| Gly 281            |                                                                                   | oxygen atom at position 12   |
| His 244            |                                                                                   | benzene ring 1               |

**Table S3.** The results acute test of 6'-*O*-caffeoylarbutin in mice (n=20)

| Group   | Number of mice | Final dose (mg·kg <sup>-1</sup> ) | Death toll (♀/♂) | Death rate (%) |
|---------|----------------|-----------------------------------|------------------|----------------|
| Vehicle | 20             | -                                 | 0/0              | 0              |
| CA-1    | 20             | 28056                             | 3/2              | 25             |
| CA-2    | 20             | 23848                             | 0/1              | 5              |
| CA-3    | 20             | 20272                             | 0/0              | 0              |

**Table S4.** Effect of 6'-*O*-caffeoylarbutin on body weight in mice

| Group   | Gender | Initial body weight | After the delivery |              |              |            | Body weight gain (g) |
|---------|--------|---------------------|--------------------|--------------|--------------|------------|----------------------|
|         |        |                     | 1st day            | 3rd day      | 7th day      | 14th day   |                      |
| Vehicle | Female | 21.37±0.79          | 23.22±1.12         | 24.30±1.05   | 25.06±0.61   | 27.42±1.07 | 2.36±1.22            |
|         | Male   | 30.89±0.91          | 33.42±1.36         | 33.17±1.10   | 35.63±1.07   | 38.00±1.88 | 2.37±1.87            |
| CA-1    | Female | 21.34±0.66          | 22.26±0.97         | 24.28±1.18   | 24.88±1.09   | 27.10±1.39 | 2.22±0.62            |
|         | Male   | 30.86±0.73          | 30.75±2.11**       | 33.62±2.35   | 35.25±2.53   | 37.90±3.13 | 2.65±1.01            |
| CA-2    | Female | 21.20±0.60          | 21.58±1.21**       | 23.05±0.45** | 23.59±0.50** | 25.47±1.36 | 1.88±1.17            |
|         | Male   | 29.96±0.94          | 30.91±0.87**       | 33.07±1.24   | 33.88±1.71   | 37.26±2.19 | 3.38±1.23            |
| CA-3    | Female | 21.27±0.58          | 22.21±0.87         | 23.36±0.66*  | 24.21±0.91*  | 26.62±1.54 | 2.41±1.51            |
|         | Male   | 30.32±0.88          | 30.89±1.57**       | 33.88±1.41   | 35.33±1.44   | 36.78±3.53 | 1.45±3.11            |

Statistical analysis: \*\*/\* had a significant difference compared with the Vehicle group ( $p<0.05/0.01$ ).
